# Supplementary material
Source: PubMed Central journal article supplement (PMC7573062)
Supplement: 12288_2020_1259_MOESM1_ESM.pdf [file 12288_2020_1259_MOESM1_ESM.pdf]

**Title:** Effectiveness and cost-effectiveness of prophylactic voriconazole and fluconazole regarding prevention of post-hematopoietic stem cell transplantation invasive fungal infection and its related death: A single center experience

**Journal name:** Indian Journal of Hematology and Blood Transfusion

**Author names:** Amro El-Ghammaz, Maha El-Zimaity, Amal Elafifi, Essam Abdelwahed, Mohamed Moussa, Yasmin Aboelmagd, Mohamed Kotob, Hebatullah Fares

**Corresponding author:**

Name: Amro Mohamed Sedky El-Ghammaz

Affiliation: Clinical Hematology and Bone Marrow Transplantation Unit, Department of Internal Medicine, Faculty of Medicine, Ain Shams University, Cairo, Egypt

e-mail: [amro.sedky@yahoo.com](mailto:amro.sedky@yahoo.com)

**Comparison of IFI and IRD rates between voriconazole and fluconazole arms in patient subgroups:**

| Patient subgroups      |                | Allogeneic HSCT |                 |       |                 |                 |       | ASCT            |                 |       |              |                 |       |
|------------------------|----------------|-----------------|-----------------|-------|-----------------|-----------------|-------|-----------------|-----------------|-------|--------------|-----------------|-------|
|                        |                | IFI             |                 |       | IRD             |                 |       | IFI             |                 |       | IRD          |                 |       |
|                        |                | V               | F               | P     | V               | F               | P     | V               | F               | P     | V            | F               | P     |
| Age                    | >mean†         | 1/6<br>(16.7%)  | 3/8<br>(37.5%)  | 0.393 | 1/6<br>(16.7%)  | 1/8<br>(12.5%)  | 0.825 | 2/10<br>(20%)   | 3/9<br>(33.3%)  | 0.510 | 0/10<br>(0%) | 1/9<br>(11.1%)  | 0.279 |
|                        | <mean†         | 3/11<br>(27.3%) | 3/9<br>(33.3%)  | 0.769 | 1/11<br>(9.1%)  | 1/9<br>(11.1%)  | 0.881 | 2/8<br>(25%)    | 3/9<br>(33.3%)  | 0.707 | 0/8<br>(0%)  | 1/9<br>(11.1%)  | 0.331 |
| Sex                    | Male           | 4/13<br>(30.8%) | 2/8<br>(25%)    | 0.776 | 2/13<br>(15.4%) | 0/8<br>(0%)     | 0.243 | 1/8<br>(12.5%)  | 2/12<br>(16.7%) | 0.798 | 0/0          | 0/0             | ***** |
|                        | Female         | 0/4<br>(0%)     | 4/9<br>(44.4%)  | 0.109 | 0/4<br>(0%)     | 2/9<br>(22.2%)  | 0.305 | 3/10<br>(30%)   | 4/6<br>(66.7%)  | 0.152 | 0/10<br>(0%) | 2/6<br>(33.3%)  | 0.051 |
| HCT-CI                 | 0              | 3/13<br>(23.1%) | 4/14<br>(28.6%) | 0.745 | 1/13<br>(7.7%)  | 1/14<br>(7.1%)  | 0.957 | 2/14<br>(14.3%) | 5/16<br>(31.2%) | 0.273 | 0/14<br>(0%) | 1/16<br>(6.2%)  | 0.341 |
|                        | 1              | 1/4<br>(25%)    | 1/2<br>(50%)    | 0.540 | 1/4<br>(25%)    | 0/2<br>(0%)     | 0.439 | 2/3<br>(66.7%)  | 0/1 (0%)        | 0.248 | 0/3<br>(0%)  | 0/1 (0%)        | ***** |
|                        | 2              | 0/0             | 1/1<br>(100%)   | *     | 0/0             | 1/1<br>(100%)   | ****  | 0/1 (0%)        | 1/1<br>(100%)   | 0.157 | 0/1<br>(0%)  | 1/1<br>(100%)   | 0.157 |
| Diagnosis              | AL             | 3/12<br>(25%)   | 0/7<br>(0%)     | 0.149 | 1/12<br>(8.3%)  | 0/7<br>(0%)     | 0.433 | 0/0             | 0/0             | **    | 0/0          | 0/0             | **    |
|                        | BM failure     | 1/2<br>(50%)    | 3/5<br>(60%)    | 0.809 | 1/2<br>(50%)    | 1/5<br>(20%)    | 0.427 | 0/0             | 0/0             | **    | 0/0          | 0/0             | **    |
|                        | MPN/MDS        | 0/2<br>(0%)     | 1/3<br>(33.3%)  | 0.361 | 0/2<br>(0%)     | 0/3<br>(0%)     | ***** | 0/0             | 0/0             | **    | 0/0          | 0/0             | **    |
|                        | R/R lymphoma   | 0/1<br>(0%)     | 2/2<br>(100%)   | 0.083 | 0/1<br>(0%)     | 1/2<br>(50%)    | 0.386 | 2/8<br>(25%)    | 4/11<br>(36.4%) | 0.599 | 0/8<br>(0%)  | 1/11<br>(9.1%)  | 0.381 |
|                        | MM/PCL         | 0/0             | 0/0             | **    | 0/0             | 0/0             | **    | 2/10<br>(20%)   | 2/7<br>(28.6%)  | 0.682 | 0/10<br>(0%) | 1/7<br>(14.3%)  | 0.218 |
| TBI-based conditioning | +ve            | 2/5<br>(40%)    | 1/2<br>(50%)    | 0.809 | 0/5<br>(0%)     | 1/2<br>(50%)    | 0.088 | 0/0             | 0/0             | **    | 0/0          | 0/0             | **    |
|                        | -ve            | 2/12<br>(16.7%) | 5/15<br>(33.3%) | 0.326 | 2/12<br>(16.7%) | 1/15<br>(6.7%)  | 0.411 | 4/18<br>(22.2%) | 6/18<br>(33.3%) | 0.457 | 0/18<br>(0%) | 2/18<br>(11.1%) | 0.146 |
| RIC                    | +ve            | 2/5<br>(40%)    | 3/4<br>(75%)    | 0.294 | 1/5<br>(20%)    | 1/4<br>(25%)    | 0.858 | 0/0             | 0/0             | **    | 0/0          | 0/0             | **    |
|                        | -ve            | 2/12<br>(16.7%) | 3/13<br>(23.1%) | 0.689 | 1/12<br>(8.3%)  | 1/13<br>(7.7%)  | 0.953 | 4/18<br>(22.2%) | 6/18<br>(33.3%) | 0.457 | 0/18<br>(0%) | 2/18<br>(11.1%) | 0.146 |
| ATG use                | +ve            | 2/5<br>(40%)    | 2/2<br>(100%)   | 0.147 | 1/5<br>(20%)    | 1/2<br>(50%)    | 0.427 | 0/0             | 0/0             | **    | 0/0          | 0/0             | **    |
|                        | -ve            | 2/12<br>(16.7%) | 4/15<br>(26.7%) | 0.535 | 1/12<br>(8.3%)  | 1/15<br>(6.7%)  | 0.869 | 4/18<br>(22.2%) | 6/18<br>(33.3%) | 0.457 | 0/18<br>(0%) | 2/18<br>(11.1%) | 0.146 |
| Steroid use            | +ve            | 4/9<br>(44.4%)  | 5/8<br>(62.5%)  | 0.457 | 2/9<br>(22.2%)  | 2/8<br>(25%)    | 0.893 | 1/7<br>(14.3%)  | 1/4 (25%)       | 0.658 | 0/7<br>(0%)  | 0/4 (0%)        | ***** |
|                        | -ve            | 0/8<br>(0%)     | 1/9<br>(11.1%)  | 0.331 | 0/8<br>(0%)     | 0/9<br>(0%)     | ***** | 3/11<br>(27.3%) | 5/14<br>(35.7%) | 0.653 | 0/11<br>(0%) | 2/14<br>(14.3%) | 0.191 |
| Donor                  | ASCT           | 0/0             | 0/0             | **    | 0/0             | 0/0             | **    | 4/18<br>(22.2%) | 6/18<br>(33.3%) | 0.457 | 0/18<br>(0%) | 2/18<br>(11.1%) | 0.146 |
|                        | MRD            | 3/14<br>(21.4%) | 6/17<br>(35.3%) | 0.397 | 1/14<br>(7.1%)  | 2/17<br>(11.8%) | 0.665 | 0/0             | 0/0             | **    | 0/0          | 0/0             | **    |
|                        | Haploidentical | 1/3<br>(33.3%)  | 0/0             | ***   | 1/3<br>(33.3%)  | 0/0             | ***   | 0/0             | 0/0             | **    | 0/0          | 0/0             | **    |
| Graft failure          | +ve            | 3/4<br>(75%)    | 3/3<br>(100%)   | 0.350 | 2/4<br>(50%)    | 1/3<br>(33.3%)  | 0.659 | 0/0             | 1/2 (50%)       | ***   | 0/0          | 1/2<br>(50%)    | ***   |
|                        | -ve            | 1/13<br>(7.7%)  | 3/14<br>(21.4%) | 0.315 | 0/13<br>(0%)    | 1/14<br>(7.1%)  | 0.326 | 4/18<br>(22.2%) | 5/16<br>(31.2%) | 0.551 | 0/18<br>(0%) | 1/16<br>(6.2%)  | 0.282 |
| Grade II-IV GVHD       | +ve            | 3/4<br>(75%)    | 2/6<br>(33.3%)  | 0.197 | 1/4<br>(25%)    | 0/6<br>(0%)     | 0.197 | 0/0             | 0/0             | **    | 0/0          | 0/0             | **    |
|                        | -ve            | 1/13<br>(7.7%)  | 4/11<br>(36.4%) | 0.085 | 1/13<br>(7.7%)  | 2/11<br>(18.2%) | 0.439 | 4/18<br>(22.2%) | 6/18<br>(33.3%) | 0.457 | 0/18<br>(0%) | 2/18<br>(11.1%) | 0.146 |

Abbreviations: HSCT, Hematopoietic Stem Cell Transplantation; ASCT, Autologous stem cell transplantation; IFI, Invasive fungal infection; IRD, Invasive fungal infection-related death; V, Voriconazole; F, Fluconazole; HCT-CI, Hematopoietic cell transplantation comorbidity index; AL, Acute leukemia; BM, Bone marrow; MPN, Myeloproliferative neoplasm; MDS, Myelodysplastic syndrome; R/R, relapsed/refractory; MM, Multiple myeloma; PCL, Plasma cell leukemia; TBI, Total body irradiation; RIC, Reduced intensity conditioning; ATG, Antithymocyte globulin; MRD, Matched related donor; GVHD, Graft versus host disease

†mean age in Allogeneic HSCT group = 28.5 years; mean age in ASCT group = 43.2 years

\*no statistics are computed because antifungal prophylaxis and IFI are constants

\*\*no statistics are computed because no cases were censored

\*\*\*no statistics are computed because antifungal prophylaxis is a constant

\*\*\*\*no statistics are computed because antifungal prophylaxis and IRD are constants

\*\*\*\*\*no statistics are computed because IRD is a constant
